# Supplementary material
Source: PubMed Central journal article supplement (PMC5815884)
Supplement: NIHMS937265-supplement-BMM_13_2_025003_suppdata_pdf.pdf [file NIHMS937265-supplement-BMM_13_2_025003_suppdata_pdf.pdf]

## **Supporting Information**

### **Effect of Incorporating Clustered Silica Nanoparticles on the Performance and Biocompatibility of Catechol-Containing PEG-Based Bioadhesive**

Rattapol Pinnaratip, Hao Meng, Rupak M. Rajachar, Bruce P. Lee\*

---

Corresponding Author:

Dr. Bruce P. Lee

Email: [bplee@mtu.edu](mailto:bplee@mtu.edu)

Department of Biomedical Engineering, Michigan Technological University, Houghton, Michigan  
49931, United States

---

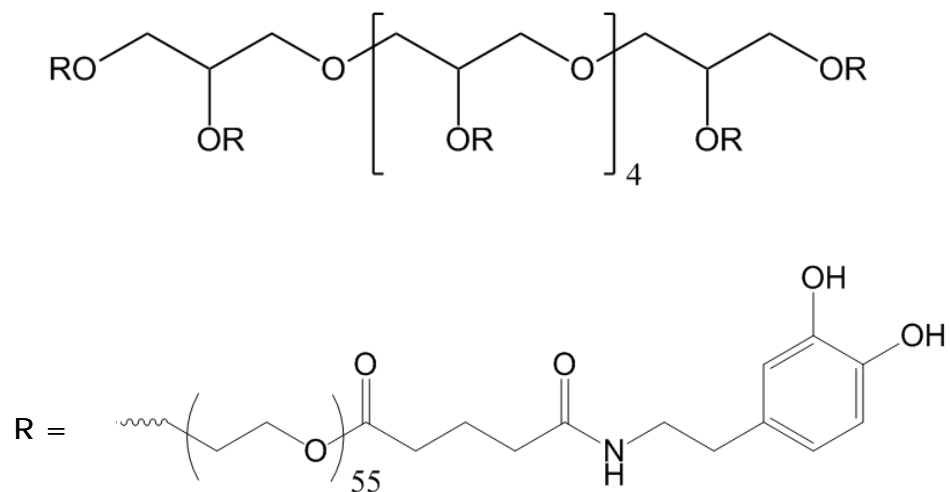

**Figure S1.** Chemical structure of PEG-DA with a hexaglycerol core. The molecular weight of PEG is 20kDa.

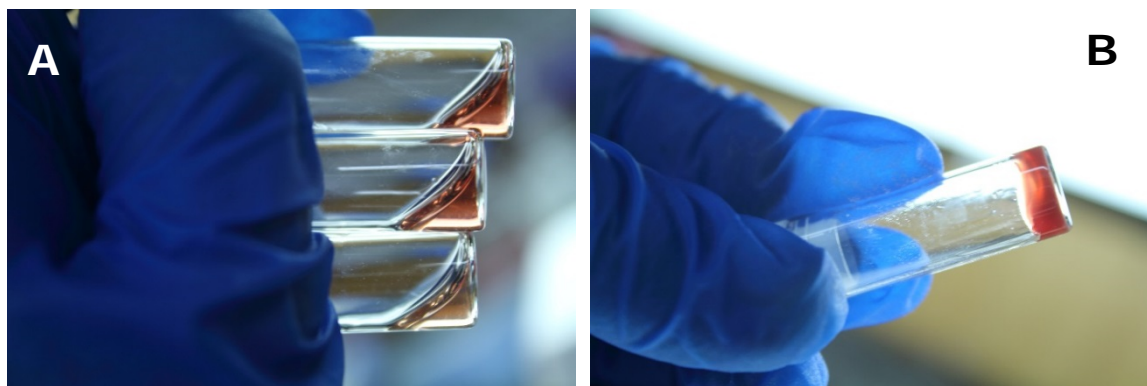

**Figure S2.** Photograph of the adhesive before (A) and after (B) curing.

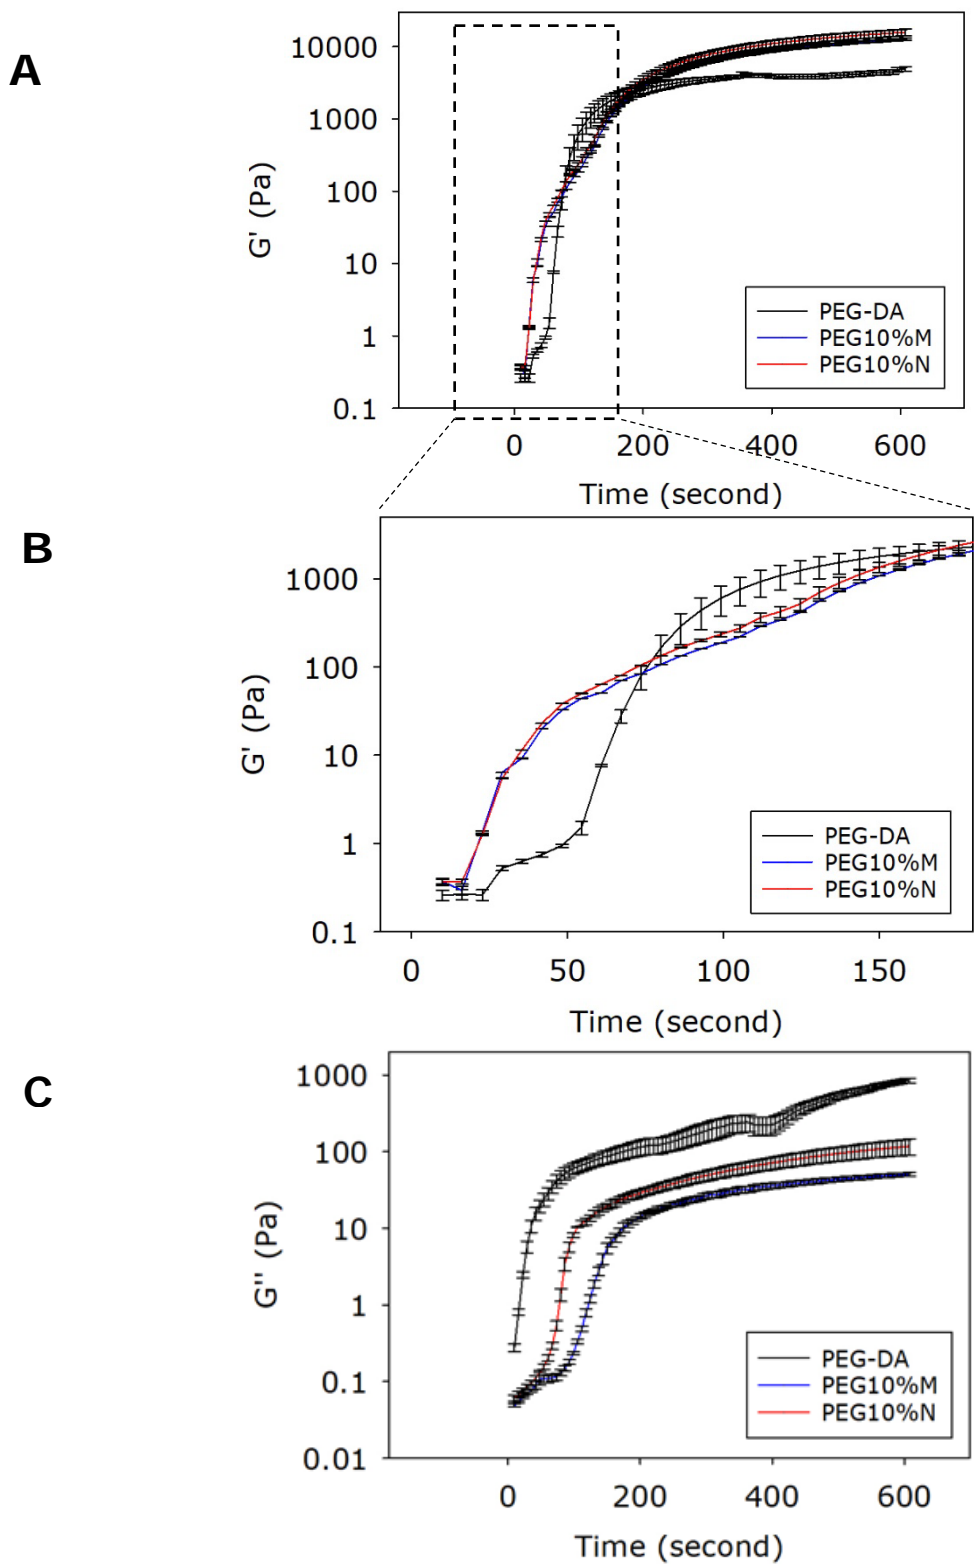

**Figure. S3** Storage ( $G'$ ) (A and B) and loss ( $G''$ ) (C) moduli of the PEG-DA composite adhesives during the initial curing process at a frequency and amplitude of 0.1 Hz and 10% strain, respectively.  $G'$  is higher than  $G''$  for both PEG10%M and PEG10%N starting at 10 second indicate faster gelation compared to PEG-DA (starting at 50 second) (B)

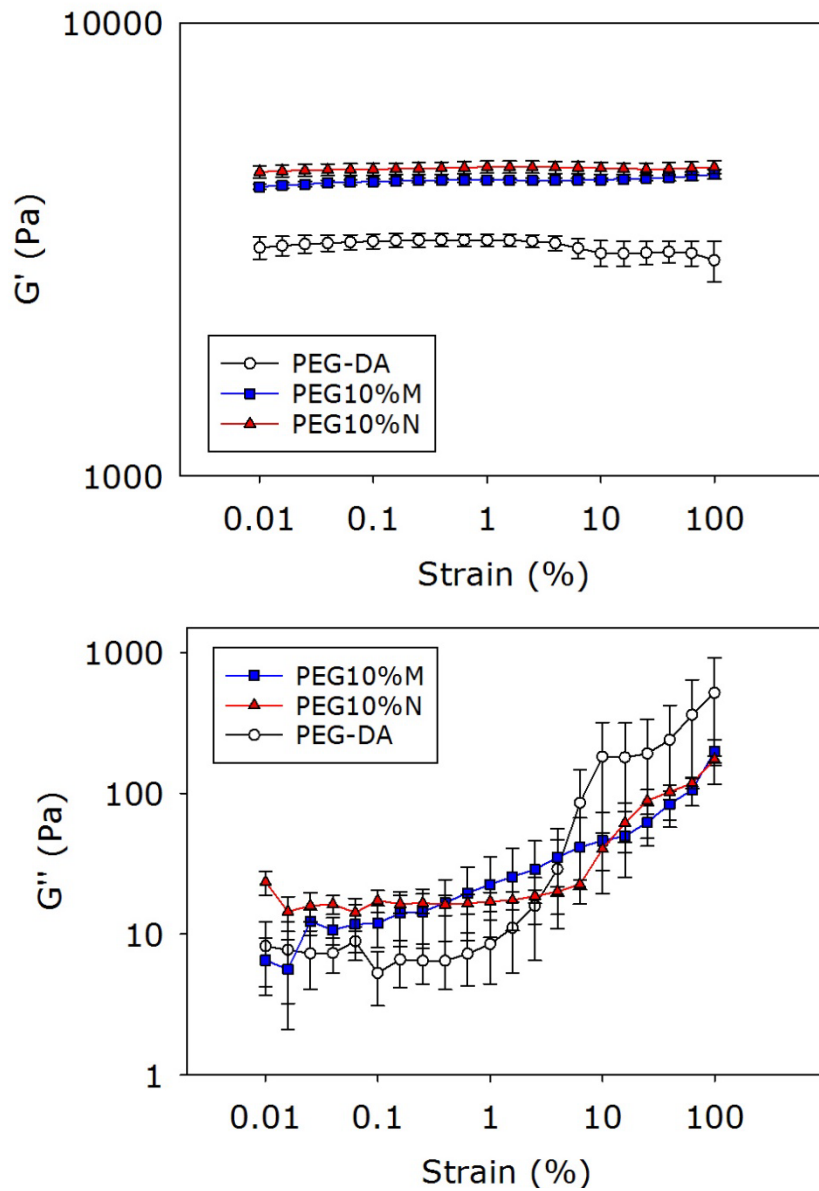

**Figure S4.** Storage ( $G'$ ) and loss ( $G''$ ) moduli of the PEG-DA composite adhesives after 24-hour incubation in PBS test at a strain of 0.01-100 % and a frequency of 1 Hz.

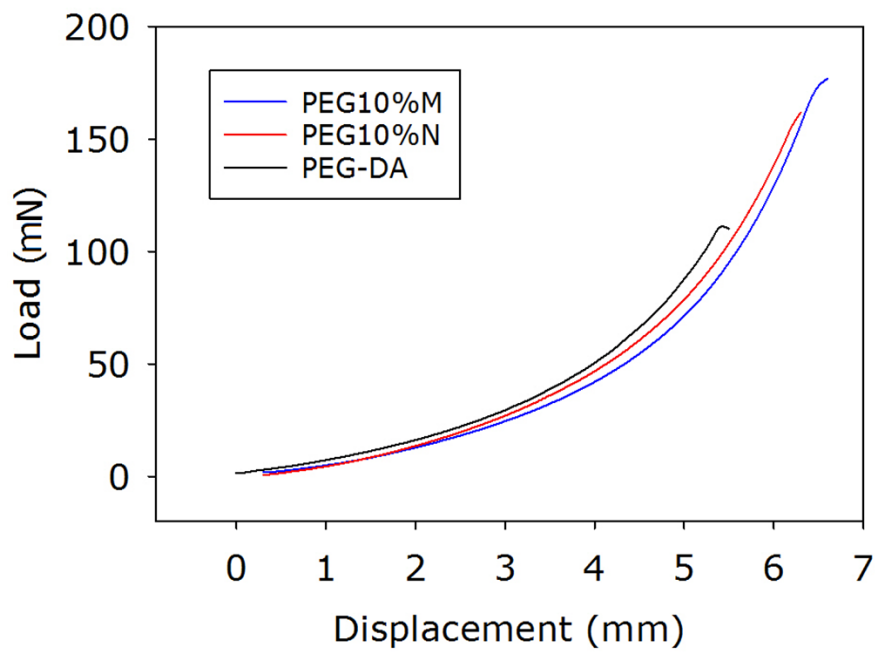

**Figure S5.** Representative load vs. displacement curves for PEG10%M, PEG10%N, and PEG-DA during lap shear adhesion testing.

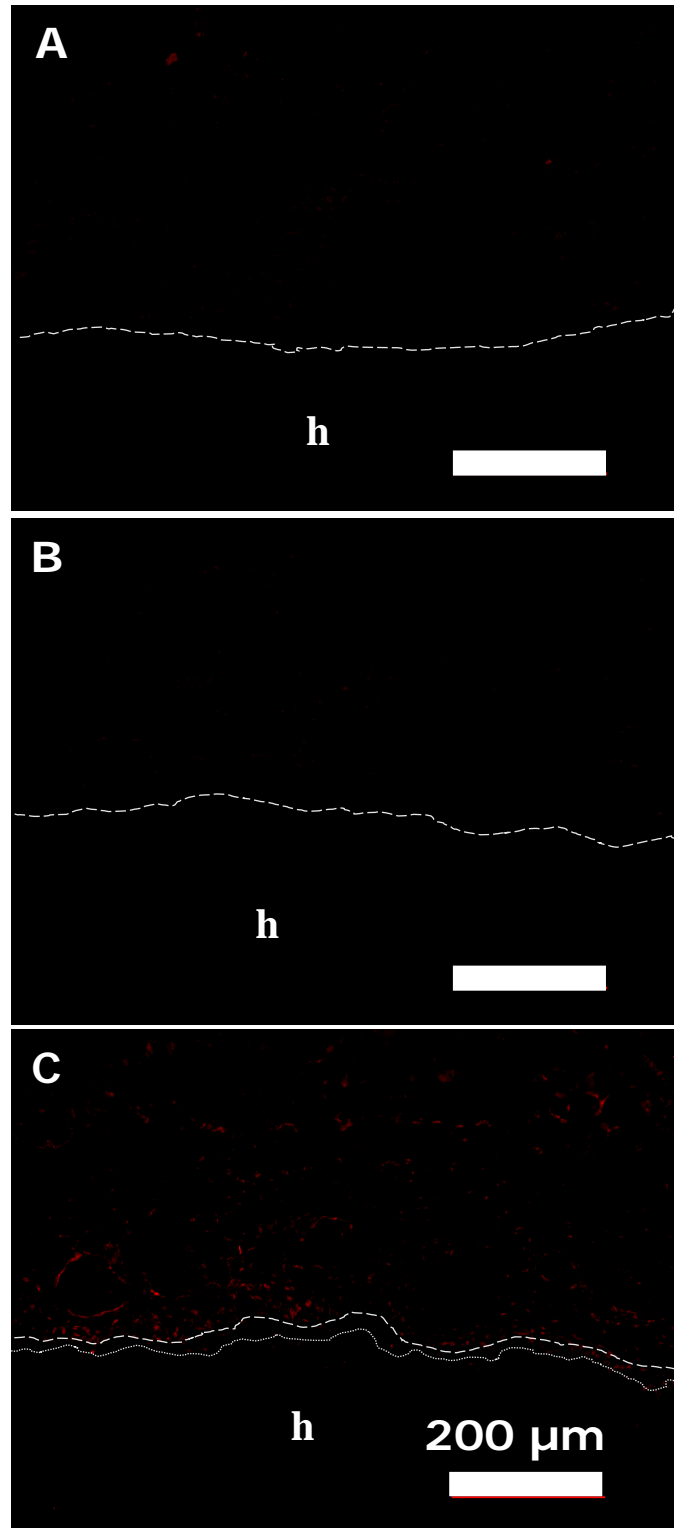

**Figure S6.** CD163 M2 macrophage staining (red color) of the surrounding tissues implanted with PEG-DA (**A**), PEG10%N (**B**), and PEG10%M (**C**). Dash lines indicate the tissue-adhesive interface. The dotted line in (**C**) indicates the depth of cellular infiltration. The letter "h" indicates the location of the adhesive. Scale bar is 200  $\mu\text{m}$ .
